# Supplementary material for: Centrocortin potentiates co-translational localization of its mRNA to the centrosome via dynein
Source: PubMed Central journal article supplement — bioRxiv. 2024 Aug 9:2024.08.09.607365. Preprint. [Version 1] doi: 10.1101/2024.08.09.607365 (PMC11326273; doi:10.1101/2024.08.09.607365), 2024-08-09
Supplement: NIHPP2024.08.09.607365v1-supplement-1.pdf [file NIHPP2024.08.09.607365v1-supplement-1.pdf]

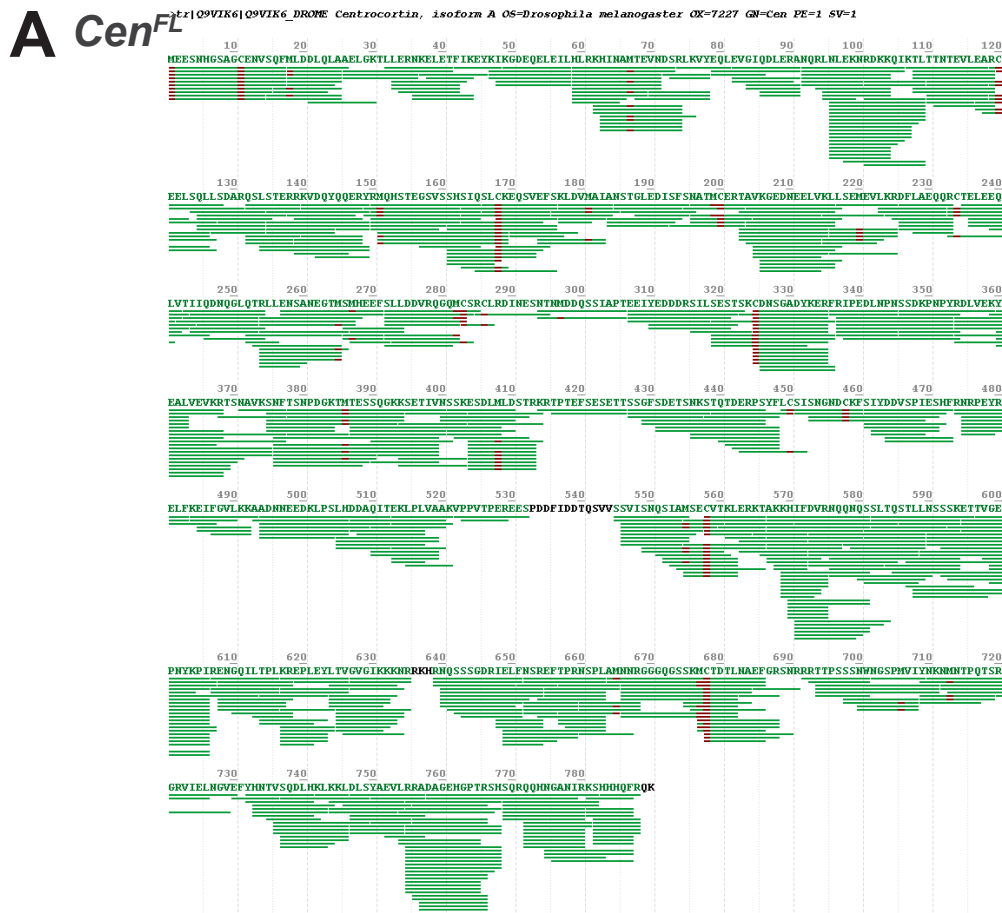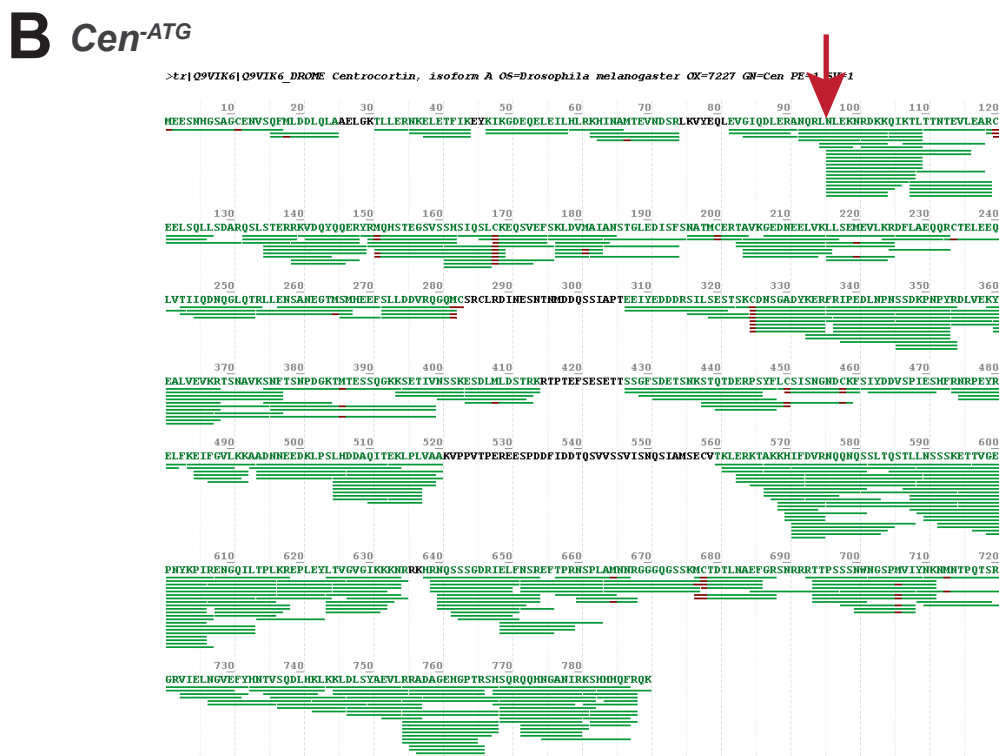

**Supplemental Figure 1. Mass spectrometry analysis of Cen protein products.** (B) Sequence mapping of spectra (green lines) from (A) Cen<sup>FL</sup> and (B) Cen-ATG, as identified by mass spectrometry following anti-HA immunoprecipitation from 1–2-day ovarian extracts. The HA-tagged constructs were expressed in the Cen null background. The UniProt reference Cen sequence used was Q9VIK6. The arrow marks the most N-terminal position where abundant Cen spectra map to the Cen-ATG protein product. The first 90–100 AA are not well covered by the spectra and are likely absent from the truncation. Data shown are representative of two independent experiments.

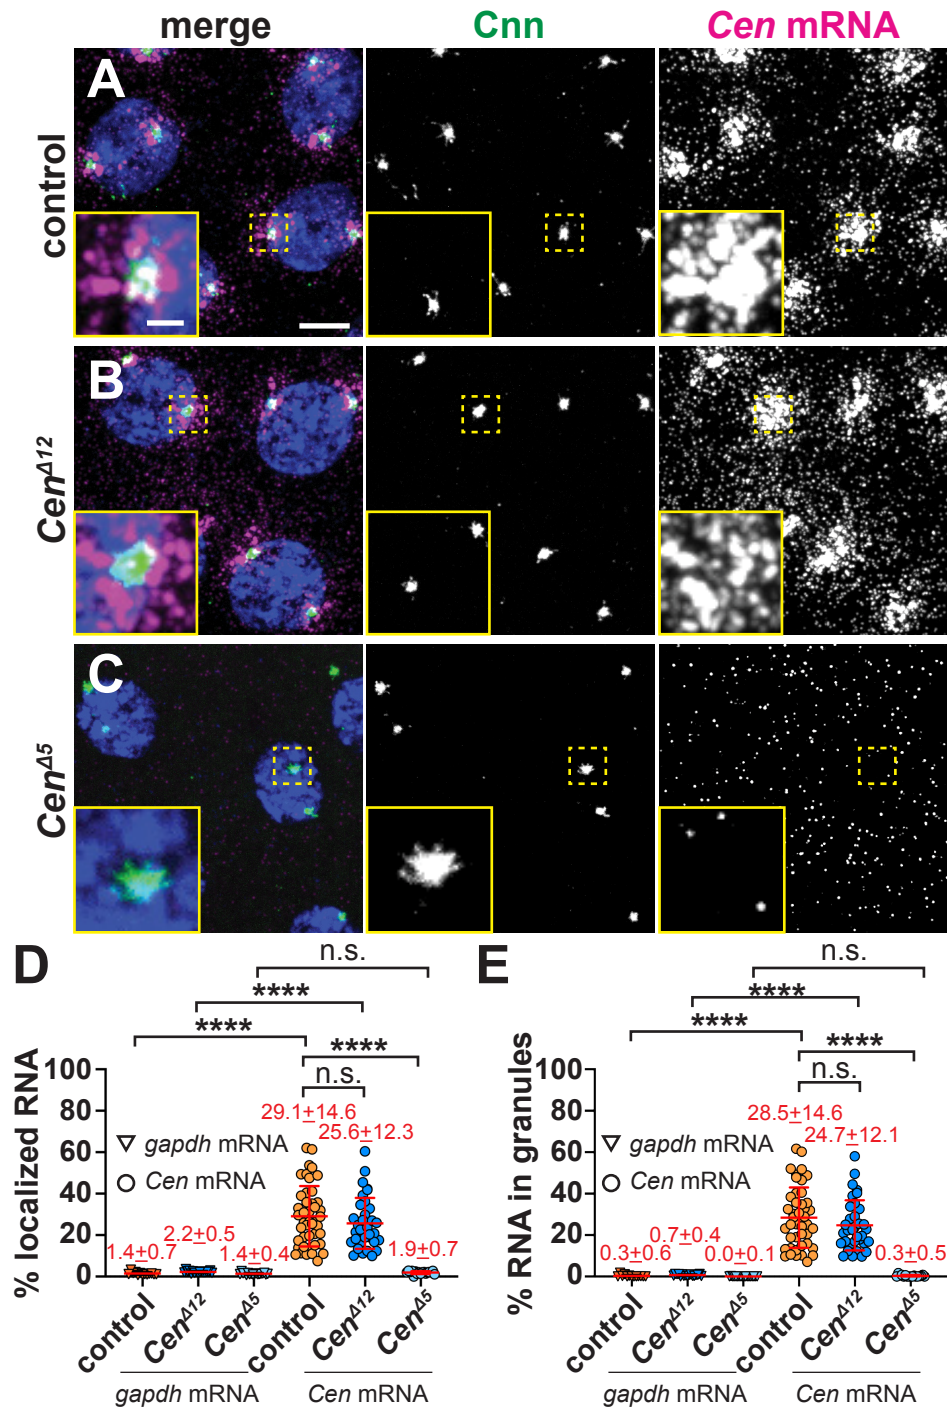

**Supplemental Figure 2. Cen mRNA localization in early embryos.** Maximum-intensity projections of NC 11 interphase embryos expressing GFP-Cnn (green) stained with Cen smFISH (magenta) and DAPI (blue nuclei). (A) Control embryos show Cen mRNA enriched at centrosomes, primarily in RNPs, which are also present in (B) *Cen*<sup>Δ12</sup> samples. (C) Cen mRNA localization and granule formation are severely impaired in *Cen*<sup>Δ5</sup> embryos. Quantification of the percentage of Cen or *gapdh* mRNAs (D) overlapping with the centrosome surface and (E) residing in granules (0 μm distance from Cnn). Each dot represents a single measurement from control (N= 13 *gapdh* and 44 Cen mRNA), *Cen*<sup>Δ12</sup> (N= 17 *gapdh* and 34 Cen mRNA), and *Cen*<sup>Δ5</sup> (N= 18 *gapdh* and 17 Cen mRNA) labelled embryos. Mean ± SD shown. \*\*\*\*, P<0.0001 by Brown-Forsythe and Welch ANOVA tests followed by Dunnett's T3 multiple comparison test. Scale bar: 5μm; 1μm (insets).
